# Supplementary material for: Perspectives on the use of aromatherapy from clinicians attending an integrative medicine continuing education event
Source: BMC Complement Altern Med. 2019 Jul 12;19:174. doi: 10.1186/s12906-019-2572-y (PMC6625079; doi:10.1186/s12906-019-2572-y)
Supplement: Supplementary file 2 — *Aromatherapy Perspectives – original dataset *This is the raw dataset of the survey answers. (XLSX 34 kb) [file 12906_2019_2572_MOESM2_ESM.xlsx]

## Sheet: Sheet1
Session Name
PEARSON 11-10-2017 10-28 AM
Date Created
2017-11-10 08:54:26
Average Score
0
Results Detail
Device ID	Q6	Q7	Q8	Q9	Q10	Q11	Q12	Q13	Q14	Q15	Q16	Q17	Q18	Q19	Q20	Q21	Q22	Q23	Q24	Q25	Q26	Q27	Total Points	Score
Answer Key	-	-	-	-	-	-	-	-	-	-	-	-	-	-	-	-	-	-	-	-	-	-	0	-
789025	-	-	B	-	-	-	-	-	-	-	-	-	-	-	-	-	-	-	-	-	-	-	0	-
3F52E8	A	B	-	B	A	-	A	C	-	A	B	-	-	-	-	-	C	C	B	B	-	-	0	-
1CC6E5	-	-	-	-	-	-	-	-	-	-	-	-	-	-	-	-	-	-	-	-	-	-	0	-
3F5423	B	B	-	C	E	B	C	C	B	A	B	A	A	A	A	A	C	C	-	A	A	A	0	-
7B1F18	B	B	-	D	E	A	A	A	B	A	A	A	C	C	A	A	C	A	A	A	A	A	0	-
7A7610	D	-	-	D	C	A	-	-	B	B	B	-	-	C	-	A	C	C	D	-	A	A	0	-
1E4F00	D	B	-	C	E	B	A	C	B	B	B	A	E	C	A	A	C	A	D	B	A	A	0	-
1C155D	D	B	-	C	B	A	A	C	B	B	B	A	E	E	A	A	C	C	B	B	A	A	0	-
1CC324	A	B	-	B	B	B	-	B	B	B	B	-	-	C	A	A	B	A	B	-	A	A	0	-
7A76C5	-	-	-	D	A	A	C	-	B	B	B	C	E	-	B	A	-	C	D	-	A	-	0	-
3F5B68	A	B	-	B	B	B	A	C	B	B	-	A	E	-	-	-	-	A	D	-	-	-	0	-
3F5AC9	A	B	-	A	B	A	A	B	B	A	B	A	C	C	A	A	A	A	-	A	A	A	0	-
7B6CD6	A	B	-	C	B	A	A	A	B	B	A	A	C	C	A	A	A	A	D	A	A	A	0	-
1D8BD3	-	-	-	-	-	-	-	-	-	-	-	-	-	-	A	A	A	A	A	B	-	-	0	-
7A76BE	B	A	-	C	C	A	C	C	B	B	B	A	C	A	B	A	B	B	B	B	A	A	0	-
7ADFBF	A	B	-	C	A	A	A	C	B	A	B	A	C	A	A	A	B	A	B	A	A	A	0	-
788FC9	D	A	-	C	A	A	C	A	B	A	A	A	C	C	A	A	A	A	B	A	A	A	0	-
3F53D3	C	A	-	-	-	A	C	C	-	-	-	-	-	-	-	-	-	-	-	-	-	-	0	-
384AFB	B	B	-	B	B	B	A	C	B	A	B	A	A	A	A	A	C	A	D	B	-	A	0	-
7B6DAC	B	B	-	A	B	B	C	A	B	B	A	A	A	C	A	A	C	A	D	A	A	A	0	-
3F5B4D	A	A	-	C	B	A	C	C	B	B	B	A	E	A	A	A	B	A	A	B	B	A	0	-
2A696E	A	B	-	D	A	B	A	B	B	A	A	A	C	C	A	A	A	A	A	A	A	A	0	-
C30C9	-	-	-	-	-	-	-	-	-	-	-	-	-	-	-	-	-	-	-	-	-	-	0	-
1787A9	C	B	-	A	E	A	C	A	B	A	A	A	C	C	C	A	A	A	A	A	A	A	0	-
1F0213	B	B	-	B	A	A	C	C	-	A	B	A	A	A	C	A	B	A	B	B	A	A	0	-
E146F	B	-	-	B	B	-	A	C	B	A	B	A	E	A	-	A	A	A	D	B	B	A	0	-
78907C	D	B	-	C	C	B	A	A	B	A	A	A	C	C	A	A	A	A	A	A	A	A	0	-
384AD1	D	B	-	D	C	A	A	C	B	B	B	A	A	C	C	A	-	C	B	A	A	A	0	-
3F52F6	B	B	-	-	C	-	A	C	B	A	B	A	A	C	A	A	-	A	A	-	-	A	0	-
1E4F7E	B	B	-	B	C	A	C	B	B	A	A	A	C	C	A	A	A	A	A	A	A	A	0	-
7A762C	B	B	-	D	E	A	C	-	-	-	-	-	-	-	-	-	-	-	-	B	A	A	0	-
7ADF31	D	B	-	D	E	A	A	C	B	A	B	A	C	C	A	A	B	A	A	A	A	A	0	-
78907D	B	-	-	A	-	A	A	C	B	B	B	A	E	A	A	A	C	C	B	B	A	A	0	-
7B6CDF	A	A	-	C	E	A	A	C	B	A	B	A	C	C	A	A	C	A	D	A	A	A	0	-
E1509	A	B	-	A	A	A	A	C	B	A	B	A	C	C	A	A	C	A	D	A	A	A	0	-
1A2623	B	B	C	D	C	A	A	C	B	A	B	A	C	C	A	A	A	A	A	B	A	A	0	-
7B6DB5	D	B	-	B	E	A	A	B	-	A	A	A	C	C	A	A	A	A	A	A	A	A	0	-
7B6CD8	A	B	-	A	B	B	A	B	B	B	B	A	C	C	A	A	A	A	A	A	A	A	0	-
1CC1FA	-	-	-	-	-	-	-	-	-	-	-	-	-	-	-	-	-	-	-	-	-	-	0	-
1E4F69	D	B	-	C	E	A	A	C	B	B	B	C	C	E	C	A	C	C	B	B	A	A	0	-
7A75BD	-	-	-	-	-	-	-	B	B	B	B	A	E	C	A	-	-	-	-	-	A	A	0	-
7B6CD0	E	A	-	C	E	A	C	A	B	B	B	A	A	A	A	A	C	A	B	B	A	A	0	-
3F5BF2	E	A	-	C	A	A	-	C	B	B	B	A	E	C	A	A	A	C	D	B	A	A	0	-
121A1C	C	A	-	B	E	A	C	C	B	B	B	C	-	D	B	B	B	B	B	B	A	A	0	-
1C133F	C	A	-	D	E	A	C	C	B	A	B	A	C	A	B	B	B	B	B	B	A	A	0	-
3F5B06	B	B	-	A	A	A	A	B	B	A	A	A	C	C	A	C	C	A	B	A	A	A	0	-
7B6DB0	A	B	-	-	B	B	A	A	B	A	B	A	C	C	A	A	A	A	A	A	A	A	0	-
1A2154	A	B	-	A	E	A	A	B	B	B	B	A	E	C	A	A	A	A	A	A	A	B	0	-
3849F1	B	B	-	A	B	A	C	C	B	A	B	A	A	A	C	A	A	A	D	A	A	A	0	-
1D8C33	B	B	-	A	E	B	A	C	B	B	B	A	E	A	C	A	C	C	D	A	A	B	0	-
1E4F06	B	B	-	B	E	A	C	C	B	A	B	A	C	C	A	A	A	A	A	A	A	A	0	-
7A7612	D	B	-	D	C	A	A	C	B	A	B	A	D	C	A	A	A	A	B	A	A	A	0	-
3F536F	-	-	-	-	-	-	-	C	-	-	B	A	-	-	-	-	-	-	-	-	A	-	0	-
1C8C3C	B	B	-	C	A	B	A	B	B	A	A	A	C	C	A	A	C	A	A	A	A	A	0	-
3F540A	D	B	-	A	B	B	D	A	B	A	B	A	C	-	A	A	A	A	-	A	-	-	0	-
140EB2	B	B	-	C	E	A	A	C	B	B	B	A	E	C	A	C	A	A	D	A	A	A	0	-
3ED389	A	B	-	B	C	A	A	B	B	B	A	A	C	C	A	A	C	A	D	A	A	A	0	-
3F52FD	-	-	A	-	-	-	-	-	-	-	-	-	-	-	-	-	-	-	-	A	-	A	0	-
1CC7DF	B	B	-	C	E	A	C	C	B	A	B	A	C	A	C	A	B	C	B	B	A	A	0	-
1D30B1	B	B	-	C	B	B	A	B	B	A	A	A	C	C	A	A	A	A	D	A	A	A	0	-
1E5033	C	B	-	B	E	A	A	B	B	A	A	A	C	C	A	A	A	A	A	A	A	A	0	-
3F5369	A	B	-	B	C	A	A	C	-	B	B	A	C	A	A	A	B	B	B	B	B	A	0	-
E1536	A	B	-	A	E	A	A	C	B	B	B	C	E	A	A	A	C	A	B	B	A	A	0	-
175AFB	A	B	-	A	C	A	C	C	B	B	B	C	E	A	A	A	C	C	D	A	A	A	0	-
79198D	B	B	-	C	C	B	C	C	B	B	B	A	E	C	A	A	A	A	A	A	A	A	0	-
1CC7DB	E	B	-	C	-	A	C	A	B	A	B	C	E	C	A	A	C	A	D	A	A	A	0	-
3FCDCB	C	B	-	D	E	A	C	C	B	B	B	A	C	A	C	C	C	C	B	B	A	A	0	-
173FBD	C	B	-	A	A	A	A	B	B	B	B	A	D	A	A	A	C	A	D	A	A	A	0	-
384AF5	B	B	-	B	C	A	C	C	B	B	B	A	E	A	A	A	C	A	D	A	A	B	0	-
1787D7	A	B	-	C	A	B	A	B	B	A	B	A	C	C	A	A	A	A	A	A	A	A	0	-
7A76B2	-	B	-	D	-	-	C	C	-	-	-	-	-	-	-	-	-	-	-	-	-	-	0	-
3F5B42	A	B	-	D	E	A	A	B	B	A	A	A	C	C	A	A	A	A	A	A	A	A	0	-
1D2F4D	-	-	-	-	-	-	-	-	-	-	-	-	-	-	A	A	A	A	A	B	A	A	0	-
1CC2C5	A	B	-	B	B	A	B	C	-	B	B	A	E	A	C	A	B	A	B	B	B	A	0	-
796193	A	B	-	A	B	B	A	B	B	B	A	A	D	C	A	A	A	A	A	A	A	A	0	-
3F5AE2	D	B	-	A	A	B	D	C	B	B	B	A	D	A	C	A	C	C	D	B	B	A	0	-
3F5BFD	-	-	-	-	-	-	-	-	-	-	-	-	-	-	-	-	-	-	D	-	-	-	0	-
79193C	B	B	-	D	E	A	C	C	B	A	B	A	C	C	A	A	A	-	A	A	A	A	0	-
3F5A9A	A	B	-	C	A	B	A	B	B	A	A	A	A	C	A	A	A	A	D	A	A	A	0	-
3F5BB0	A	B	-	A	E	A	A	B	B	A	A	A	C	C	A	A	A	A	B	A	A	A	0	-
1CC348	B	B	-	A	C	B	A	A	B	A	A	A	C	C	A	A	C	A	B	A	A	A	0	-
7B1F22	B	B	-	A	B	B	A	C	B	A	B	A	A	C	A	A	C	A	D	A	A	A	0	-
1759D9	A	B	-	D	A	A	A	C	B	B	B	A	C	C	A	A	C	A	D	B	A	A	0	-
1E4FBD	B	B	-	B	A	A	A	C	B	B	B	A	C	C	A	A	C	A	D	B	A	A	0	-
789024	C	B	-	A	B	B	A	C	B	A	B	A	A	C	A	A	A	A	B	B	A	A	0	-
3ED40E	B	A	-	B	E	A	A	C	B	B	B	A	D	C	C	C	C	A	D	B	A	A	0	-
3F5A9F	B	B	-	A	C	B	A	B	B	B	B	A	C	C	A	A	A	A	A	A	A	A	0	-
7AF237	B	A	-	C	-	A	-	C	B	A	B	A	C	A	C	A	C	A	B	B	A	A	0	-
3F5B4A	B	B	-	C	E	A	A	C	B	A	B	A	C	C	A	A	C	A	A	A	A	A	0	-
7A7697	B	B	-	A	B	A	C	C	B	B	B	C	E	A	-	A	C	A	D	A	A	A	0	-
3F5395	C	C	-	C	B	B	C	C	B	B	A	B	D	D	B	B	B	-	-	B	-	-	0	-
2A6993	C	B	-	C	C	A	C	C	B	A	B	A	C	C	A	A	C	A	D	B	A	A	0	-
3E7BDE	D	B	-	D	C	A	A	C	B	B	B	A	A	E	A	A	C	C	D	A	A	A	0	-
3FD1D7	A	B	-	C	A	B	A	B	B	B	B	A	A	C	A	A	A	A	A	A	A	A	0	-
3FCD6E	B	B	A	D	E	B	C	C	B	B	B	A	A	C	C	A	C	C	A	A	B	A	0	-
7B1F06	B	B	-	B	C	A	A	C	B	A	B	A	E	E	C	A	C	C	D	B	A	A	0	-
1D2FDC	B	B	-	C	E	A	C	C	B	A	B	C	C	E	A	A	C	C	B	B	A	A	0	-
7B6CFF	B	B	-	D	E	A	A	B	B	A	A	A	C	C	A	A	A	A	D	A	A	A	0	-
3F53AF	C	A	B	A	C	A	C	C	B	A	B	A	A	C	A	A	A	A	B	A	A	A	0	-
789078	A	B	-	A	E	B	A	C	B	B	B	A	A	A	A	C	A	A	B	A	A	A	0	-
3F5A7A	A	B	-	A	B	B	F	C	B	A	B	A	E	C	A	A	C	A	A	A	A	A	0	-
7AF26A	B	B	-	A	B	A	A	-	B	B	B	A	A	C	A	A	A	A	A	A	A	A	0	-
1B0DA7	E	A	-	D	A	A	C	C	B	B	B	A	A	E	A	A	A	A	D	A	A	A	0	-
3FCD1B	B	B	-	C	C	A	A	B	B	B	B	C	C	C	A	A	B	A	D	B	A	A	0	-
1CC2CC	D	B	-	C	C	A	A	C	B	B	B	A	A	A	B	A	B	B	B	B	A	A	0	-
7A7685	D	-	-	D	-	A	A	C	B	B	B	C	D	C	A	-	C	A	D	B	B	A	0	-
3F5BE9	D	B	-	C	B	B	F	B	B	B	B	A	C	C	C	C	C	C	D	A	A	A	0	-
3FF4B3	B	A	-	D	B	B	C	C	B	B	B	C	D	A	C	C	C	C	B	B	A	A	0	-
3ED288	-	-	-	-	-	-	-	-	-	-	-	-	C	C	C	A	A	A	B	A	A	A	0	-
Participant List Averages	-	-	-	-	-	-	-	-	-	-	-	-	-	-	-	-	-	-	-	-	-	-	0	-

## Sheet: Sheet2
	6. What is your age?	7. With what gender do you identify?	9. What is your practice location?	10. In what type of facility do you primarily work?	11. Are you a primary care provider (internal medicine, family medicine, pediatrics, general OB/GYN)	12. What type of clinician are you?	13. Apart from this event, have you received education on the use of essential oils or aromatherapy?	14. Have you undergone a formal training course to become a certified clinical aromatherapist?	15. In the last 12 months, at least one of my patients has asked me about the use of essential oils for therapeutic purposes.	16. I feel confident in my ability to counsel patients on the safe use of essential oils for therapeutic purposes.	17. I consider essential oils to be generally safe when used appropriately.	18. My patients who use essential oils typically use them…	19. I believe the use of essential oils may be beneficial…	20. I believe that there is a need for increased clinician training in the use of essential oils.	21. I believe that there is a need for more research on the use of essential oils.	22. I believe that there is a need for better reimbursement for the clinical use of essential oils.	23. I would like to offer essential oil recommendations or therapies to my patients.	24. I would like to undergo training to become certified in clinical aromatherapy.	25. In the last 12 months, I have used essential oils for myself and/or my family.	26. In the last 12 months, I have used integrative medicine approaches other than aromatherapy for myself and/or my family (acupuncture, massage, chiropractic, etc.).	27. In the last 12 months, I have recommended integrative medicine approaches other than aromatherapy in a clinical setting (acupuncture, massage, chiropractic, etc.).
Device ID	Q6	Q7	Q9	Q10	Q11	Q12	Q13	Q14	Q15	Q16	Q17	Q18	Q19	Q20	Q21	Q22	Q23	Q24	Q25	Q26	Q27
3F5423	B	B	C	E	B	C	C	B	A	B	A	A	A	A	A	C	C	-	A	A	A
7B1F18	B	B	D	E	A	A	A	B	A	A	A	C	C	A	A	C	A	A	A	A	A
1E4F00	D	B	C	E	B	A	C	B	B	B	A	E	C	A	A	C	A	D	B	A	A
1C155D	D	B	C	B	A	A	C	B	B	B	A	E	E	A	A	C	C	B	B	A	A
1CC324	A	B	B	B	B	-	B	B	B	B	-	-	C	A	A	B	A	B	-	A	A
3F5AC9	A	B	A	B	A	A	B	B	A	B	A	C	C	A	A	A	A	-	A	A	A
7B6CD6	A	B	C	B	A	A	A	B	B	A	A	C	C	A	A	A	A	D	A	A	A
7A76BE	B	A	C	C	A	C	C	B	B	B	A	C	A	B	A	B	B	B	B	A	A
7ADFBF	A	B	C	A	A	A	C	B	A	B	A	C	A	A	A	B	A	B	A	A	A
788FC9	D	A	C	A	A	C	A	B	A	A	A	C	C	A	A	A	A	B	A	A	A
384AFB	B	B	B	B	B	A	C	B	A	B	A	A	A	A	A	C	A	D	B	-	A
7B6DAC	B	B	A	B	B	C	A	B	B	A	A	A	C	A	A	C	A	D	A	A	A
3F5B4D	A	A	C	B	A	C	C	B	B	B	A	E	A	A	A	B	A	A	B	B	A
2A696E	A	B	D	A	B	A	B	B	A	A	A	C	C	A	A	A	A	A	A	A	A
1787A9	C	B	A	E	A	C	A	B	A	A	A	C	C	C	A	A	A	A	A	A	A
1F0213	B	B	B	A	A	C	C	-	A	B	A	A	A	C	A	B	A	B	B	A	A
E146F	B	-	B	B	-	A	C	B	A	B	A	E	A	-	A	A	A	D	B	B	A
78907C	D	B	C	C	B	A	A	B	A	A	A	C	C	A	A	A	A	A	A	A	A
384AD1	D	B	D	C	A	A	C	B	B	B	A	A	C	C	A	-	C	B	A	A	A
3F52F6	B	B	-	C	-	A	C	B	A	B	A	A	C	A	A	-	A	A	-	-	A
1E4F7E	B	B	B	C	A	C	B	B	A	A	A	C	C	A	A	A	A	A	A	A	A
7ADF31	D	B	D	E	A	A	C	B	A	B	A	C	C	A	A	B	A	A	A	A	A
78907D	B	-	A	-	A	A	C	B	B	B	A	E	A	A	A	C	C	B	B	A	A
7B6CDF	A	A	C	E	A	A	C	B	A	B	A	C	C	A	A	C	A	D	A	A	A
E1509	A	B	A	A	A	A	C	B	A	B	A	C	C	A	A	C	A	D	A	A	A
1A2623	B	B	D	C	A	A	C	B	A	B	A	C	C	A	A	A	A	A	B	A	A
7B6DB5	D	B	B	E	A	A	B	-	A	A	A	C	C	A	A	A	A	A	A	A	A
7B6CD8	A	B	A	B	B	A	B	B	B	B	A	C	C	A	A	A	A	A	A	A	A
1E4F69	D	B	C	E	A	A	C	B	B	B	C	C	E	C	A	C	C	B	B	A	A
7B6CD0	E	A	C	E	A	C	A	B	B	B	A	A	A	A	A	C	A	B	B	A	A
3F5BF2	E	A	C	A	A	-	C	B	B	B	A	E	C	A	A	A	C	D	B	A	A
121A1C	C	A	B	E	A	C	C	B	B	B	C	-	D	B	B	B	B	B	B	A	A
1C133F	C	A	D	E	A	C	C	B	A	B	A	C	A	B	B	B	B	B	B	A	A
3F5B06	B	B	A	A	A	A	B	B	A	A	A	C	C	A	C	C	A	B	A	A	A
7B6DB0	A	B	-	B	B	A	A	B	A	B	A	C	C	A	A	A	A	A	A	A	A
3849F1	B	B	A	B	A	C	C	B	A	B	A	A	A	C	A	A	A	D	A	A	A
1E4F06	B	B	B	E	A	C	C	B	A	B	A	C	C	A	A	A	A	A	A	A	A
7A7612	D	B	D	C	A	A	C	B	A	B	A	D	C	A	A	A	A	B	A	A	A
1C8C3C	B	B	C	A	B	A	B	B	A	A	A	C	C	A	A	C	A	A	A	A	A
140EB2	B	B	C	E	A	A	C	B	B	B	A	E	C	A	C	A	A	D	A	A	A
3ED389	A	B	B	C	A	A	B	B	B	A	A	C	C	A	A	C	A	D	A	A	A
1CC7DF	B	B	C	E	A	C	C	B	A	B	A	C	A	C	A	B	C	B	B	A	A
1D30B1	B	B	C	B	B	A	B	B	A	A	A	C	C	A	A	A	A	D	A	A	A
1E5033	C	B	B	E	A	A	B	B	A	A	A	C	C	A	A	A	A	A	A	A	A
3F5369	A	B	B	C	A	A	C	-	B	B	A	C	A	A	A	B	B	B	B	B	A
E1536	A	B	A	E	A	A	C	B	B	B	C	E	A	A	A	C	A	B	B	A	A
175AFB	A	B	A	C	A	C	C	B	B	B	C	E	A	A	A	C	C	D	A	A	A
79198D	B	B	C	C	B	C	C	B	B	B	A	E	C	A	A	A	A	A	A	A	A
1CC7DB	E	B	C	-	A	C	A	B	A	B	C	E	C	A	A	C	A	D	A	A	A
3FCDCB	C	B	D	E	A	C	C	B	B	B	A	C	A	C	C	C	C	B	B	A	A
173FBD	C	B	A	A	A	A	B	B	B	B	A	D	A	A	A	C	A	D	A	A	A
1787D7	A	B	C	A	B	A	B	B	A	B	A	C	C	A	A	A	A	A	A	A	A
3F5B42	A	B	D	E	A	A	B	B	A	A	A	C	C	A	A	A	A	A	A	A	A
1CC2C5	A	B	B	B	A	B	C	-	B	B	A	E	A	C	A	B	A	B	B	B	A
796193	A	B	A	B	B	A	B	B	B	A	A	D	C	A	A	A	A	A	A	A	A
3F5AE2	D	B	A	A	B	D	C	B	B	B	A	D	A	C	A	C	C	D	B	B	A
79193C	B	B	D	E	A	C	C	B	A	B	A	C	C	A	A	A	-	A	A	A	A
3F5A9A	A	B	C	A	B	A	B	B	A	A	A	A	C	A	A	A	A	D	A	A	A
3F5BB0	A	B	A	E	A	A	B	B	A	A	A	C	C	A	A	A	A	B	A	A	A
1CC348	B	B	A	C	B	A	A	B	A	A	A	C	C	A	A	C	A	B	A	A	A
7B1F22	B	B	A	B	B	A	C	B	A	B	A	A	C	A	A	C	A	D	A	A	A
1759D9	A	B	D	A	A	A	C	B	B	B	A	C	C	A	A	C	A	D	B	A	A
1E4FBD	B	B	B	A	A	A	C	B	B	B	A	C	C	A	A	C	A	D	B	A	A
789024	C	B	A	B	B	A	C	B	A	B	A	A	C	A	A	A	A	B	B	A	A
3ED40E	B	A	B	E	A	A	C	B	B	B	A	D	C	C	C	C	A	D	B	A	A
3F5A9F	B	B	A	C	B	A	B	B	B	B	A	C	C	A	A	A	A	A	A	A	A
7AF237	B	A	C	-	A	-	C	B	A	B	A	C	A	C	A	C	A	B	B	A	A
3F5B4A	B	B	C	E	A	A	C	B	A	B	A	C	C	A	A	C	A	A	A	A	A
7A7697	B	B	A	B	A	C	C	B	B	B	C	E	A	-	A	C	A	D	A	A	A
2A6993	C	B	C	C	A	C	C	B	A	B	A	C	C	A	A	C	A	D	B	A	A
3E7BDE	D	B	D	C	A	A	C	B	B	B	A	A	E	A	A	C	C	D	A	A	A
3FD1D7	A	B	C	A	B	A	B	B	B	B	A	A	C	A	A	A	A	A	A	A	A
3FCD6E	B	B	D	E	B	C	C	B	B	B	A	A	C	C	A	C	C	A	A	B	A
7B1F06	B	B	B	C	A	A	C	B	A	B	A	E	E	C	A	C	C	D	B	A	A
1D2FDC	B	B	C	E	A	C	C	B	A	B	C	C	E	A	A	C	C	B	B	A	A
7B6CFF	B	B	D	E	A	A	B	B	A	A	A	C	C	A	A	A	A	D	A	A	A
3F53AF	C	A	A	C	A	C	C	B	A	B	A	A	C	A	A	A	A	B	A	A	A
789078	A	B	A	E	B	A	C	B	B	B	A	A	A	A	C	A	A	B	A	A	A
3F5A7A	A	B	A	B	B	F	C	B	A	B	A	E	C	A	A	C	A	A	A	A	A
7AF26A	B	B	A	B	A	A	-	B	B	B	A	A	C	A	A	A	A	A	A	A	A
1B0DA7	E	A	D	A	A	C	C	B	B	B	A	A	E	A	A	A	A	D	A	A	A
3FCD1B	B	B	C	C	A	A	B	B	B	B	C	C	C	A	A	B	A	D	B	A	A
1CC2CC	D	B	C	C	A	A	C	B	B	B	A	A	A	B	A	B	B	B	B	A	A
7A7685	D	-	D	-	A	A	C	B	B	B	C	D	C	A	-	C	A	D	B	B	A
3F5BE9	D	B	C	B	B	F	B	B	B	B	A	C	C	C	C	C	C	D	A	A	A
3FF4B3	B	A	D	B	B	C	C	B	B	B	C	D	A	C	C	C	C	B	B	A	A
1A2154	A	B	A	E	A	A	B	B	B	B	A	E	C	A	A	A	A	A	A	A	B
1D8C33	B	B	A	E	B	A	C	B	B	B	A	E	A	C	A	C	C	D	A	A	B
384AF5	B	B	B	C	A	C	C	B	B	B	A	E	A	A	A	C	A	D	A	A	B
3F52E8	A	B	B	A	-	A	C	-	A	B	-	-	-	-	-	C	C	B	B	-	-
7A76C5	-	-	D	A	A	C	-	B	B	B	C	E	-	B	A	-	C	D	-	A	-
3F5B68	A	B	B	B	B	A	C	B	B	-	A	E	-	-	-	-	A	D	-	-	-
1D8BD3	-	-	-	-	-	-	-	-	-	-	-	-	-	A	A	A	A	A	B	-	-
3F53D3	C	A	-	-	A	C	C	-	-	-	-	-	-	-	-	-	-	-	-	-	-
3F536F	-	-	-	-	-	-	C	-	-	B	A	-	-	-	-	-	-	-	-	A	-
3F540A	D	B	A	B	B	D	A	B	A	B	A	C	-	A	A	A	A	-	A	-	-
7A76B2	-	B	D	-	-	C	C	-	-	-	-	-	-	-	-	-	-	-	-	-	-
3F5BFD	-	-	-	-	-	-	-	-	-	-	-	-	-	-	-	-	-	D	-	-	-
3F5395	C	C	C	B	B	C	C	B	B	A	B	D	D	B	B	B	-	-	B	-	-
7A7610	D	-	D	C	A	-	-	B	B	B	-	-	C	-	A	C	C	D	-	A	A
7A762C	B	B	D	E	A	C	-	-	-	-	-	-	-	-	-	-	-	-	B	A	A
7A75BD	-	-	-	-	-	-	B	B	B	B	A	E	C	A	-	-	-	-	-	A	A
3F52FD	-	-	-	-	-	-	-	-	-	-	-	-	-	-	-	-	-	-	A	-	A
1D2F4D	-	-	-	-	-	-	-	-	-	-	-	-	-	A	A	A	A	A	B	A	A
3ED288	-	-	-	-	-	-	-	-	-	-	-	C	C	C	A	A	A	B	A	A	A
